# Supplementary material for: An Ultrasensitive and Selective Determination of Cadmium Ions at ppt Level Using an Enzymic Membrane with Colorimetric and Electrochemical Detection
Source: MDPI journal article supplement (doi:10.3390/bios12050310), 2022-05-07
Supplement: s1 [file s1]

## Supplementary material

# An Ultrasensitive and Selective Determination of Cadmium Ions at Ppt Level Using an Enzymic Membrane with Colorimetric and Electrochemical Detection

Raouia Attaallah and Aziz Amine \*

Laboratory of Process Engineering and Environment, Faculty of Sciences and Techniques,  
Hassan II University of Casablanca, Mohammedia 21100, Morocco; raouia.attaallah-  
etu@etu.univh2c.ma

\* Correspondence: azizamine@yahoo.fr or a.amine@univh2m.ac.ma

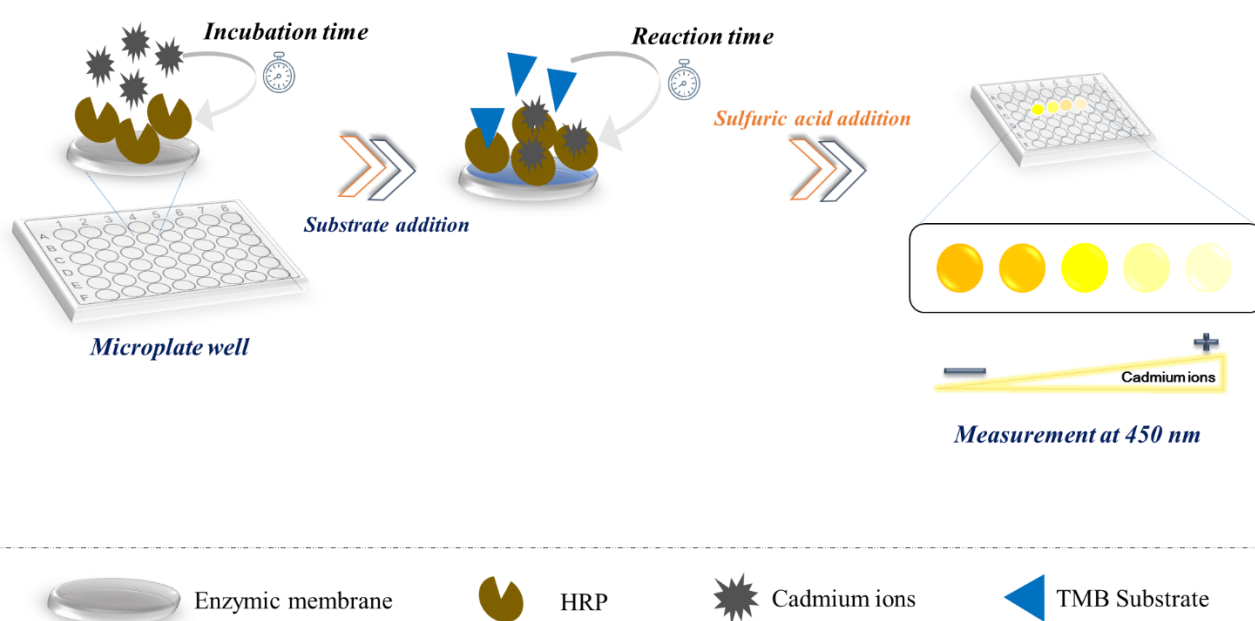

**Scheme S1.** Schematic illustration of the developed spectrophotometry assay based on enzymic membrane for cadmium ions detection.

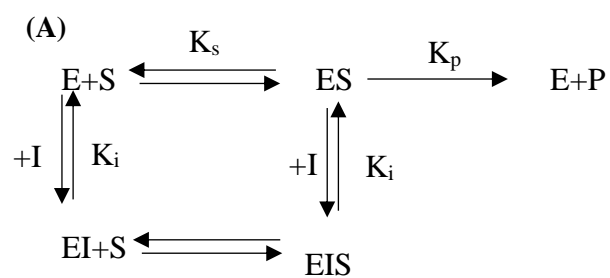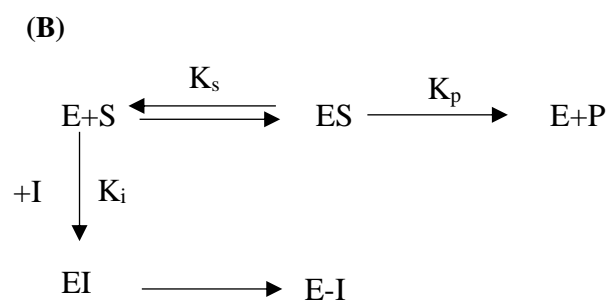

**Scheme S2.** Scheme of enzyme inhibition in the case of (A) reversible inhibition and (B) irreversible inhibition

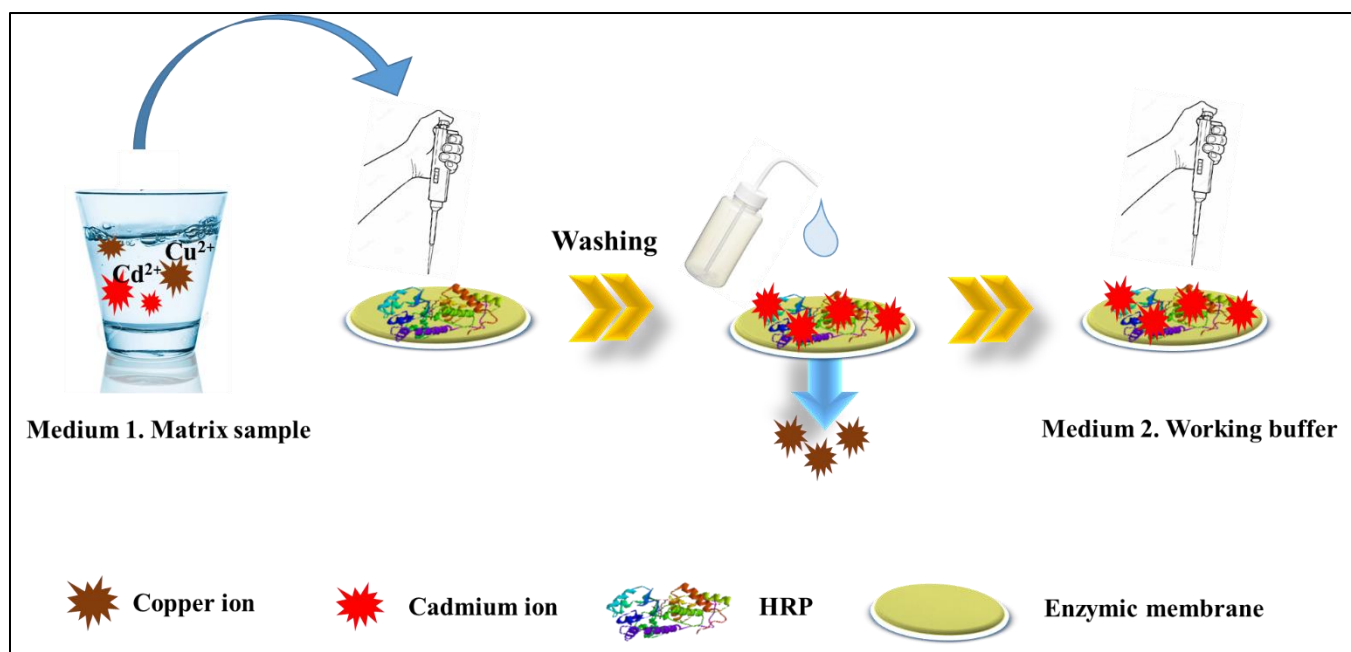

**Scheme S3.** Schematic illustration of medium exchange procedure.

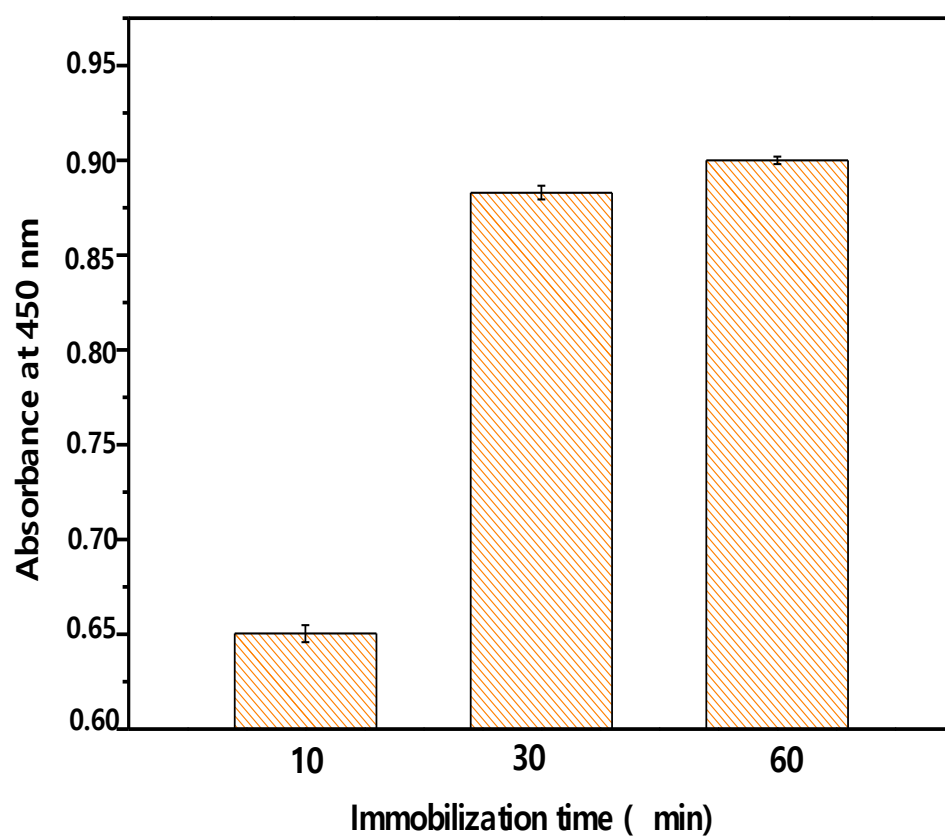

**Figure S1.** effect of immobilization time on the enzyme loading on the membrane. Data are mean  $\pm$  SD, n = 5, RSD=2 %

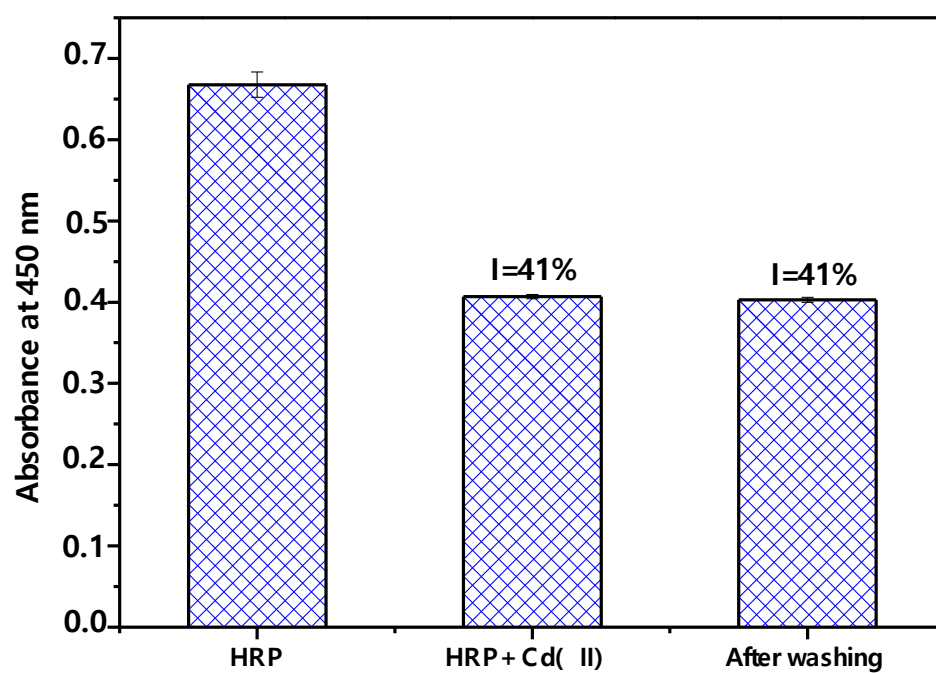

**Figure S2.** The absorbance response of the enzymic membrane when incubated with 10 ppb  $\text{Cd}^{2+}$ . Data are mean  $\pm$  SD, n = 5.

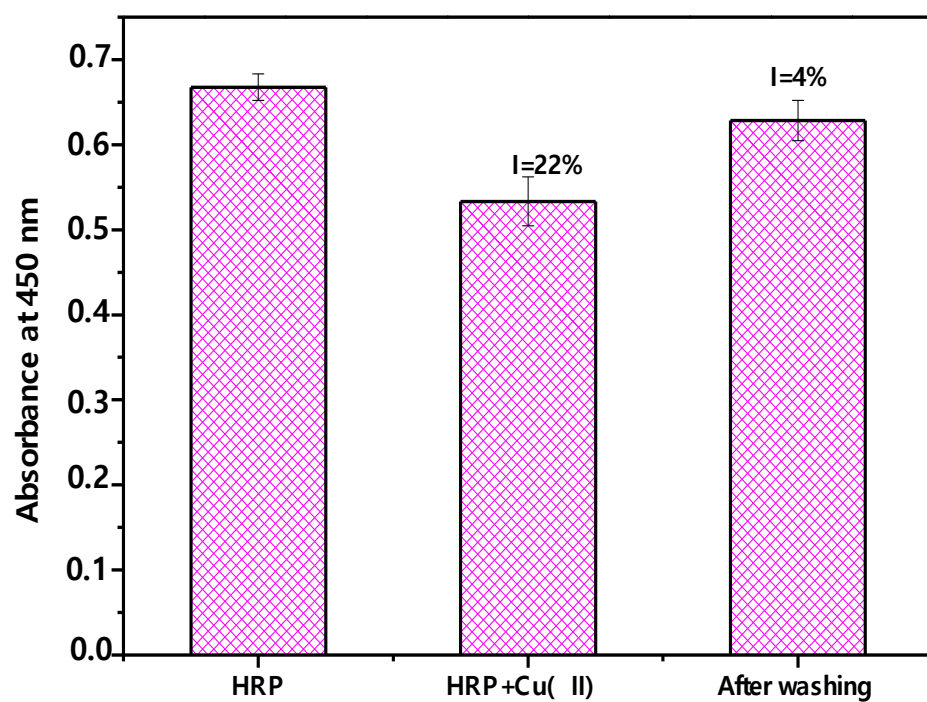

**Figure S3.** The absorbance response of the enzymic membrane when incubated with 50 ppm  $\text{Cu}^{2+}$ . Data are mean  $\pm$  SD,  $n = 5$ .

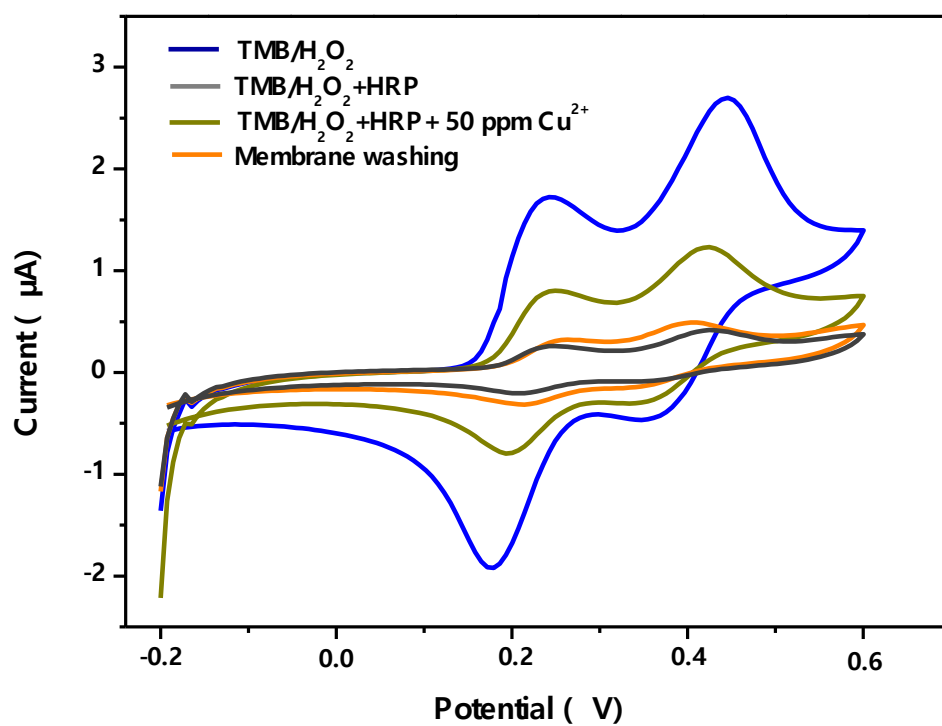

**Figure S4.** Cyclic voltammograms for the response of the biosensor when incubated before and after 50 ppm Cu<sup>2+</sup>.
